1

2 The stringent factor Rel from *Mycobacterium abscessus* regulates metabolism, but does  
3 not promote survival in stress or antibiotics

4

5 Augusto Cesar Hunt-Serracín<sup>1</sup>, Joseph M. Boll<sup>1</sup>, Cara C. Boutte<sup>1</sup>

6

7 <sup>1</sup>Department of Biology, University of Texas, Arlington

8

## 9 **Abstract**

10

11 The stringent response is a broadly conserved stress response system that exhibits  
12 functional variability across bacterial clades. Here, we characterize the role of the  
13 stringent factor Rel in the non-tuberculous mycobacterial pathogen, *Mycobacterium*  
14 *abscessus* (*Mab*). We find that Rel in *Mab* is involved in restricting transcription of  
15 anabolism and growth genes in stress, as has been observed in many other species.  
16 However, the stringent response in *Mab* does not provide a survival advantage in  
17 several stress conditions or in antibiotic treatment. According to our transcriptional  
18 profiling, Rel in *Mab* does not activate transcription of stress response or antibiotic  
19 resistance genes. Instead, Rel actually represses transcription of many antibiotic  
20 resistance genes in stress. This study implies that combinatorial therapies with stringent  
21 factor inhibitors would not potentiate antibiotic treatment against *Mab* infections.

22

## 23 **Introduction**

24

25           Bacteria must adjust their physiology to permit survival in fluctuating conditions.  
26 The stringent response is a conserved signaling system that promotes survival of many  
27 species in stress and antibiotics by altering the transcription of about a quarter of the  
28 genome (1–5). In this work, we profile the role of Rel, the sole annotated stringent  
29 factor, in the non-tuberculous, rapidly-growing mycobacterium *Mycobacterium*  
30 *abscessus* (*Mab*). *Mab* is an opportunistic pathogen that both lives in the environment,  
31 and causes skin and respiratory infections which are increasingly prevalent in Cystic  
32 Fibrosis patients (6). *Mab* infections are especially difficult to treat because this species  
33 is naturally resistant to many antibiotics (7), and highly tolerant under stress to almost  
34 all antibiotics tested (8, 9). One proposed strategy to help treat such antibiotic-  
35 recalcitrant infections is to inhibit the regulatory systems, like the stringent response,  
36 that promote antibiotic tolerance (10–13).

37           The conserved aspect of the stringent response is the synthesis, upon stress, of  
38 the hyperphosphorylated guanine (p)ppGpp by either Rel/SpoT homolog proteins (RSH,  
39 or Rel) or Small Alarmone Synthases (SAS). Once made, (p)ppGpp affects transcription  
40 in different ways (14–17) and also directly modulates replication (18, 19), nucleotide  
41 metabolism (20–22), ribosome maturation (23, 24) and translation (25–27). How exactly  
42 the stringent response exerts its effects in mycobacteria is not well understood, and the  
43 *Mab* stringent response has not been studied at all.

44           Function of the stringent response varies along with the niche and lifestyle of the  
45 species (28). For example, the photosynthetic *Synechococcus elongatus* synthesizes  
46 (p)ppGpp when it is moved into the dark (29, 30), while the coprophagous *E. coli* makes

47 (p)ppGpp when it runs out of amino acids (31, 32) or lipids (33, 34). The physiological  
48 outputs of the stringent response also vary across species, but there are conserved  
49 themes. First, the stringent response generally downregulates genes required for  
50 growth, such as ribosome and cell wall synthesis factors, and it alters transcription of  
51 central metabolism to prioritize survival rather than construction of new cells (2, 3, 17,  
52 35). In most species studied, activation of the stringent response inhibits growth (31,  
53 35–40) which indirectly protects against some stresses and antibiotics that interfere with  
54 growth factors (Fig. 1). In many species, the stringent response upregulates stress  
55 response genes such as heat shock proteins, hibernation factors, and stress-specific  
56 transcription factors (3, 41, 42) and promotes survival in stress (13) (Fig. 1).

57         The stringent response also helps many bacteria survive through antibiotic  
58 treatment by promoting antibiotic tolerance (12)(Fig. 1). Antibiotic tolerance allows a  
59 bacterial population to survive longer during treatment. This is different from antibiotic  
60 resistance, which is the ability of a population to grow in higher concentrations of  
61 antibiotic (43). Because most antibiotics inhibit enzymes required for growth, their  
62 effectiveness is proportional to growth rates (44), and much antibiotic tolerance can be  
63 achieved simply through growth inhibition. Mutations that activate the stringent  
64 response have been shown to be responsible for antibiotic-recalcitrant infections (45,  
65 46). Genetic manipulation of loci that decrease (p)ppGpp levels have been shown to  
66 lower tolerance to antibiotics in phylogenetically diverse species (5, 11, 47, 48).

67         The pathogen *Mtb* has a single stringent factor, Rel. *Mtb* induces (p)ppGpp  
68 synthesis when respiration is inhibited, in stationary phase and in total carbon and  
69 nitrogen starvation (36, 49). Rel allows long term survival of *Mtb* in nutrient and oxygen

70 starvation and stationary phase (36). While Rel in *Mtb* does not affect growth during  
71 early infection of macrophages (36), it promotes survival during chronic infection of  
72 mice (1) and guinea pigs (50, 51). Importantly, Rel also makes *Mtb* more tolerant to the  
73 first-line clinical antibiotic isoniazid during nutrient starvation and chronic infection in  
74 mice (11) (Fig. 1).

75 In this study we studied the phenotypes of the  $\Delta rel$  strain of *Mycobacterium*  
76 *abscessus*, which is lacking the sole predicted (p)ppGpp-synthesizing enzyme. We find  
77 that the *Mab*  $\Delta rel$  strain does not exhibit defects in survival in several different stress  
78 conditions, but has a growth defect relative to wild type. Importantly, the stringent  
79 response in *Mab* does not activate antibiotic tolerance; it actually inhibits tolerance to  
80 the clinically used antibiotic, amikacin. We transcriptionally profiled the effects of *rel* and  
81 find that it downregulates many metabolic pathways in stasis conditions, as is seen in  
82 other species. However, we do not find that the *Mab* stringent response upregulates  
83 stress response genes in any condition we tested.

84

## 85 **Results**

86

87 In order to explore the role of *rel* in regulating growth, survival and antibiotic tolerance in  
88 *Mab*, we built a strain of *Mab* ATCC19977 with a deletion of the *rel* gene (MAB\_2876).

89 In many species, the stringent response promotes survival during stresses such as  
90 stationary phase, acid stress, starvation, or oxidative stress (5, 36, 39, 52–54). To  
91 evaluate the physiological role of the stringent response in stress in *Mab*, we assayed  
92 survival of log. phase cultures, in 7H9 media, of the wild-type,  $\Delta rel$  and complemented

93 strains upon and after transfer to either carbon starvation (Fig. 2A), salt stress (Fig. 2B),  
94 oxidative stress, (Fig. 2C) or acidic media (pH 4) (Fig. 2D). We treated wild type and  
95 mutant *Mab* to growth limiting concentrations of these stressors and observed no  
96 differences in growth inhibition or survival relative to wild-type and the complemented  
97 strain. Thus, Rel in *Mab* does not regulate responses to these stresses under the  
98 conditions tested, or at least not enough to affect growth or survival. We also found that  
99 Rel does not promote survival in stationary phase in 7H9 media (Fig. 3A).

100 We conducted a growth curve and found that the  $\Delta rel$  strain grew more slowly  
101 than the wild-type and complemented strains (Fig. 3B). This result suggests that Rel in  
102 *Mab* largely functions to promote growth in low stress conditions. This is surprising, in  
103 view of the fact that in most species studied, the stringent response functions to arrest  
104 growth under stress (4). In several proteobacterial species, ppGpp<sup>0</sup> strains, which have  
105 deletions of all the (p)ppGpp-synthesizing enzymes, comparable to our  $\Delta rel$  strain,  
106 actually grow faster than the wild-type (38, 53, 55–57). However, in the gram positive  
107 *Enterobacter faecalis* (58) and in *Mycobacterium tuberculosis* (36), the ppGpp<sup>0</sup> strains  
108 also grow slowly, as we see in *Mab* (Fig.1).

109 Because the stringent response is a major activator of antibiotic tolerance and  
110 persistence in many species (5, 56, 58), we sought to assess how Rel contributes to  
111 antibiotic tolerance in *Mab*. First, we treated *Mab* cultures in logarithmic growth phase  
112 with the clinically used antibiotics amikacin, clarithromycin and cefoxitin (59). We found  
113 that clarithromycin alone did not kill a significant portion of any of the strains (Fig. 4A),  
114 likely due to inducible macrolide resistance that has been described (60). Cefoxitin  
115 treatment also did not have an effect. However, amikacin treatment resulted in 10-100-

116 fold decrease in viability of wild-type and complemented strains, but had no effect on  
117  $\Delta rel$ . Typically, the stringent response promotes tolerance (5, 56, 58), but here we are  
118 seeing increased tolerance when the stringent factor Rel is missing.

119 Antibiotic tolerance increases in stationary phase in most bacterial species  
120 relative to log. phase (5, 61). To assess how the stringent response in *Mab* impacts  
121 stress-induced antibiotic tolerance, we repeated the antibiotic survival experiments on  
122 stationary phase cultures. In stationary phase, Rel does not affect tolerance to  
123 clarithromycin or cefoxitin, and none of the strains are killed appreciably in this condition  
124 (Fig. 4B). Similar to amikacin treatment in growth, Rel also promotes increased  
125 susceptibility in stasis. We expected to observe greater tolerance of all strains to the  
126 cell-wall targeting drug cefoxitin in stationary phase because beta-lactam susceptibility  
127 typically correlates with growth rate (44), however, we did not (Fig. 4AB).

128 Studies are ongoing to find drugs that would inhibit Rel proteins (11, 13), as such  
129 drugs are expected to increase susceptibility to other clinically available antibiotics. Our  
130 results indicate that Rel inhibitors, should they become available, might actually  
131 increase tolerance when administered in combination with amikacin to treat *Mab*  
132 infections, and may have no effect with clarithromycin and cefoxitin.

133 A major function of the stringent response in other species is to remodel the  
134 transcriptome (4). To determine the effects of Rel on transcription in *Mab*, we compared  
135 the wild-type and  $\Delta rel$  transcriptome in both logarithmic growth and stationary phases.  
136 We found that Rel represses many more genes than it activates in both log. and  
137 stationary phase in *Mab*.

138 In mid log. phase, when the  $\Delta rel$  strain are growing more slowly (Fig. 3B), we  
139 found 150 genes that were repressed by Rel by at least 3-fold, and only 7 genes that  
140 were activated by Rel. The only annotated upregulated genes are an efflux pump  
141 (MAB\_0677) and a MFS transporter (MAB\_0069). We found several *mce* family genes  
142 that were repressed by Rel (Table S2). Mce proteins are typically lipid transporters, but  
143 they also play roles in host cell entry and immune modulation (62). Notably, we also  
144 found two antibiotic resistance genes that are repressed by Rel in log. phase,  
145 MAB\_4837 and MAB\_2875 (Table 1). MAB\_4837 is annotated as an aminoglycoside  
146 phosphotransferase; this class of enzymes inactivates aminoglycoside antibiotics.  
147 Overexpression of MAB\_4837 in the  $\Delta rel$  strain may account for the increased tolerance  
148 to amikacin seen in that strain (Fig. 4A). MAB\_2875 encodes the  $\beta$ -lactamase *bla*<sub>Mab</sub>,  
149 which degrades  $\beta$ -lactams including several penams and carbapenems, but which has  
150 very poor activity against cefoxitin (63). This may explain partly why we see no  
151 difference in susceptibility to cefoxitin between our wild type and Rel mutant strains (Fig.  
152 4).

153 Even though there was no apparent difference in survival between the wild-type  
154 and  $\Delta rel$  strains in stationary phase, we observed significant differences in transcription.  
155 We found hundreds of genes that were repressed by Rel in stationary phase, but none  
156 that were activated by Rel 3-fold or more. The two antibiotic resistance genes,  
157 MAB\_4837 and MAB\_2875, mentioned above were also significantly repressed by Rel  
158 in stationary phase, which may help explain why the antibiotic susceptibility results for  
159 amikacin and cefoxitin were not significantly different in log. and stationary phase. We  
160 also found many genes in the WhiB7 regulon (Table 1) which are repressed in

161 stationary phase, though they are mostly unaffected in log. phase. WhiB7 is a  
162 transcription factor that activates many antibiotic resistance genes and promotes  
163 resistance to many classes of antibiotics in *Mab* (64). It is notable that these antibiotic  
164 resistance genes are repressed by Rel in stasis, which would imply that the wild-type  
165 *Mab* would be more susceptible to antibiotics in this condition, which is what we see in  
166 amikacin treatment. In the case of clarithromycin and cefoxitin, increased tolerance  
167 through downregulation of target expression may counterbalance the repression of the  
168 antibiotic resistance genes, resulting in no differences in susceptibility in our assays  
169 (Fig. 4).

170 We also found several cell wall biosynthetic genes that are downregulated by Rel  
171 in stationary phase (Table S2). Downregulation of growth factors is typical in stringent  
172 responses across many bacterial species (3, 37, 58, 65, 66). However, unusually, the  
173 microarray experiment profiling the Rel transcriptome in *Mtb* found that several cell wall  
174 enzymes were upregulated by Rel in stationary phase (1).

175 We see that Rel downregulates many central metabolism genes in stationary  
176 phase. However, it is notable that not all the genes in a given pathway are  
177 downregulated by Rel equally (Fig. 5, Table S3). We hypothesize that this uneven  
178 regulation of certain pathways may allow certain metabolites to accumulate in the wild-  
179 type strain in stasis. Such metabolites may be re-directed to other pathways. We  
180 observed that several of the products of enzymes that are not downregulated, which  
181 may therefore be accumulating under these conditions, converge on the NAD synthesis  
182 pathway. None of the genes in the NAD synthesis pathway are downregulated by Rel,  
183 which implies that continued metabolism of NAD, which is a critical cofactor in many



184 pathways, may be important in stationary phase, and that flux toward its biosynthesis  
185 may be prioritized by the stringent response.

186 From our preliminary analysis, it is clear that the stringent response in *Mab* helps  
187 regulate growth and central metabolism, and affects expression of antibiotic resistance  
188 genes; however, it does not seem to upregulate specific stress responses.

189

## 190 **Discussion**

191

192 Our results show that the stringent factor Rel in *Mab* does not promote survival in  
193 many *in vitro* stress conditions (Fig.2, 3A). This is surprising because data from other  
194 species shows the stringent response is responsible for upregulating stress response  
195 genes (3, 42, 67, 68) as well as downregulating growth genes. Our transcriptomics  
196 analysis indicate that Rel in *Mab* does not upregulate stress response genes, at least  
197 during stationary phase in lab media. It is possible that stationary phase is dissimilar  
198 from any conditions that *Mab* evolved to adapt to, and therefore these data may not be  
199 physiologically relevant. However, *Mab* does not link growth arrest with activation of  
200 stress response genes by the Rel. It appears that the stringent response in *Mab* is  
201 mainly involved in downregulating metabolism for growth arrest. Other regulators must  
202 control stress response genes independently.

203 While our data show that the *Mab* stringent response does remodel metabolism  
204 during both growth and stationary phase (Table S3, Fig. 5), it is actually required for  
205 maximal growth rates during log. phase (Fig. 3B). This suggests that the stringent  
206 response in *Mab* may function more to modulate metabolism to promote growth under

207 variable conditions rather than to arrest growth in highly stressful conditions. It is  
208 interesting that ppGpp<sup>0</sup> strains of Gram positive and Actinobacterial strains tend to grow  
209 slower than the wild-type strains, whereas the ppGpp<sup>0</sup> Gram negative strains tend to  
210 grow faster than the wild-type (Fig. 1). Thus, the model that the function of the stringent  
211 response is to arrest growth under stress appears to be applicable mostly in the  
212 Proteobacteria. In Firmicutes and Actinobacteria, including *Mab*, the stringent response  
213 may actually be promoting growth under certain circumstances.

214         However, our work has not established whether the *Mab*  $\Delta rel$  strain completely  
215 lacks (p)ppGpp. In *Mtb*, Rel is the only (p)ppGpp synthesizing enzyme (36, 69).  
216 However, there are at least three enzymes in *Msmeg* that synthesize (p)ppGpp, and  
217 only two have been described (70). It is therefore possible that *Mab* has another  
218 enzyme that synthesizes (p)ppGpp, and the phenotypes we observe in the *Mab*  $\Delta rel$   
219 strain are partly due to increased (p)ppGpp due to the loss of Rel's hydrolase function.

220         Rel in *Mab* may inhibit growth more in different conditions than those tested here.  
221  $\beta$ -oxidation, *i.e.*, consumption of lipids as a carbon source, in *Mtb* is correlated with  
222 latency and pathogenesis (71, 72), and the stringent response inhibits growth in the  
223 presence of lipids as a carbon source (36), implying that it could be part of this  
224 regulation. Studies of *Mab* during infection show that  $\beta$ -oxidation genes are upregulated  
225 in macrophages and amoeba infection (73). We do not see significant differences in  
226 expression of fatty acid synthesis or degradation genes in any of the conditions we  
227 tested, but this could be because we did not add lipids to our media. The stringent  
228 response in *Mab* could possibly regulate  $\beta$ -oxidation or other processes in conditions in  
229 different nutrient conditions, or in infection.

230 We observed in our transcriptional data that Rel downregulated numerous  
231 antibiotic resistance genes in stationary phase (Table 1). This is surprising in view of the  
232 literature on the stringent response from other species, where the stringent response  
233 both promotes antibiotic tolerance (5, 11, 58) and sometimes also increases expression  
234 of antibiotic resistance genes (74, 75). *Mab* is notorious for having resistance to many  
235 clinical antibiotics and expressing many antibiotic resistance genes (64, 76, 77) which is  
236 why it is such a problematic pathogen for cystic fibrosis patients (78). Studies in *Mtb*  
237 show that the Rel-mediated stringent response activates tolerance to at least some  
238 antibiotics in that pathogen (11), and it is natural to assume that this would also hold  
239 true for *Mtb*'s close relatives (79); however, our data in *Mab* show that antibiotic  
240 tolerance in Non-tuberculous Mycobacteria (NTMs) can be regulated differently. The  
241 environmental niche of most NTMs is the soil and water systems (80), whereas *Mtb*  
242 lives exclusively in human tissues. Antibiotics have been prevalent in soil habitats for  
243 possibly a billion years (81–83), but have only been prevalent in human tissues for  
244 around 100 years (84). In addition, NTMs are likely exposed to a greater variety of  
245 environmental stresses than *Mtb*. Therefore, saprophytic NTMs like *Mab* are likely to  
246 have hard-wired the connections between stress responses and antibiotic tolerance and  
247 resistance in different ways than *Mtb*.

248 Our work shows that the stringent factor Rel in *Mab*, in lab media, works mainly  
249 to remodel metabolism, and does not appear to be important in stress responses and  
250 antibiotic tolerance. Future work will determine whether this stringent response  
251 regulates different genes and processes in infection.

252

253

## 254 **Materials and Methods**

255

256

257 **Construction of strains.** Primers 1233 – 1238 (Fig.S1A) were used to amplify a 502 bp  
258 segment upstream of *rel<sub>mab</sub>* which included the start codon, a 448 bp segment  
259 downstream of *rel<sub>mab</sub>* which included the stop codon, and a 788 bp ZeoR cassette. All 3  
260 segments were stitched together by PCR to form the  $\Delta rel::zeoR$  double stranded  
261 recombineering knockout construct. The  $\Delta rel_{Mab}$  mutant strain was generated through  
262 double stranded recombineering, as previously described (85) (Fig.S1C). Colonies from  
263 the transformation of the  $\Delta rel::zeoR$  construct were PCR checked by using primers  
264 1424-761, 1235-1236, and 762-1425 (Fig.S1A). To make the complemented strain,  
265 the *rel* gene was amplified through PCR using primers 1329-1330 and inserted into  
266 pKK216 (86) with NdeI and HindIII. This new plasmid, pCB1248, was transformed into  
267 the  $\Delta rel_{Mab}$  mutant strain in order to create the *rel<sub>Mab</sub>* complemented strain, in which *rel*  
268 expression is driven by a constitutive promoter (BN17, Fig.S1B).

269

270 **Media and culture conditions.** All *M. abscessus* ATCC 19977 wild-type cultures,  
271  $\Delta rel_{Mab}$  cultures, and *rel<sub>Mab</sub>* complemented cultures, were started in 7H9 (Becton,  
272 Dickinson, Franklin Lakes, NJ) medium with 5 g/liter bovine serum albumin, 2 g/liter  
273 dextrose, 0.85 g/liter NaCl, 0.003 g/liter catalase, 0.2% glycerol, and 0.05% Tween 80  
274 and shaken overnight at 37°C until log. phase. For starvation and other specific assays,  
275 Hartmans-de Bont (HdB) minimal medium was made as described previously (87).

276 Cultures were inoculated to an optical density of 0.05, unless otherwise stated. All CFU  
277 time points were plated on LB agar and placed in 37° C incubator for 4 days.

278

279 ***Δrel<sub>Mab</sub>* stress assays.** For all stress assays, strains were prepared and grown into log.  
280 phase. Unless otherwise stated, cultures for stress assays were done in non-culture  
281 treated 24-well plates and shaken at 130rpm in 37C incubator. For carbon starvation,  
282 strains were inoculated in 30mL inkwells in HdB minimal media with no glycerol, and  
283 with Tyloxapol as a detergent. For acid stress, strains were inoculated in 7H9 medium  
284 with a pH of 4. For osmotic stress, strains were inoculated in LB medium with 1M salt  
285 (ACS Sodium Chloride, VWR Chemicals BDH). For oxidative stress, all strains were  
286 inoculated in complete HdB minimal medium, which does not contain catalase, and  
287 strains were exposed to different concentrations of tert-Butyl Hydroperoxide (Alfa  
288 Aesar). CFU time points were taken upon inoculation, at 1 hour, 3 hours, and 24 hours  
289 post-inoculation.

290

291 ***Δrel<sub>Mab</sub>* growth curve and stationary phase survival.** Log-phase cultures of all strains  
292 were inoculated to OD 0.05 in 30mL inkwells in 7H9 media. Cultures were then placed  
293 in shaking incubator at 37C and 130rpm. CFU time points were then taken throughout a  
294 12-hour period. For stationary phase survival, a second set of cultures were grown into  
295 stationary phase up to 48 hours. Initial CFU time-point was taken at 48 hour after  
296 dilution of log. phase samples to OD=0.05, with subsequent time points taken at 5, 6, 7,  
297 8, 9, and 10 days.

298

299

300 **Antibiotic assays.** For the log. phase experiments, strains that had been kept in log.  
301 phase in 7H9 for ~24 hours were diluted to OD=0.05 and treated with either 150 µg/mL  
302 of amikacin, 200 µg/mL clarythromycin, or 80 µg/mL of cefoxitin. CFUs were measured  
303 upon treatment (T=0) and 48 hours after treatment (T=48). For stationary phase, log.  
304 phase cells at OD=0.05 were shaken for 48 hours and then treated as above. CFUs  
305 were measured upon treatment and 72 hours after treatment.

306

307 **RNA isolation, library preparation and data analysis.** RNA from three biological  
308 replicates of each strain and condition was isolated as previously described (88) with  
309 some modifications. After growth for ~24 hours in either log. or stationary phase, cells  
310 were transferred to 15mL conical tubes and centrifuged at 4C for 3 min at 4000rpm. Cell  
311 pellets were immediately resuspended in 750µl of TriZol (Invitrogen) and lysed by bead  
312 beating. RNA was purified according to protocol with the Zymogen Direct-zol RNA  
313 Miniprep Plus (cat. No 2070). RNA was processed for Illumina sequencing using the  
314 TRuSeq Total RNA Library Prep from Illumina, with bacterial rRNA removal probes  
315 provided separately by Illumina. Sequencing was performed using Illumina NovaSeq at  
316 the North Texas Genome Center at the University of Texas in Arlington.

317       Between 50-300 million pair-end reads per library were mapped to the *M.*  
318 *abscessus subs. abscessus* ATCC 19977 published genome using CLC Genomic  
319 Workbench software (Qiagen). To minimize the skewing effect that certain PCR  
320 jackpots had on the data, we adjusted the number of reads mapped from each library so  
321 that the median reads per gene was the same within an experiment. In the log. phase

322 samples, the median reads per gene was ~600. In the stationary phase samples, the  
 323 median reads per gene was ~100. After normalization, the Reads Per Kilobase Million  
 324 (RPKM) values were determined for each ORF, and the weighted proportion fold  
 325 change of RPKM between the wild type and  $\Delta rel$  strains for each condition were  
 326 calculated by CLC Workbench. The Baggerley's test was used to generate a false  
 327 discovery rate corrected P-value. We then used a cut-off of 3-fold change with a false-  
 328 discovery rate corrected P-value of  $\leq 0.05$  to identify significantly differentially regulated  
 329 genes between wild type and  $\Delta rel$  in the different conditions. Because the median reads  
 330 per gene for log. phase samples was 6 times higher than for stationary phase samples,  
 331 we linearly scaled the fold-change values when comparing wild type log. to Wild-type  
 332 stationary phase data to normalize for this difference in read depth.

333 **Acknowledgements.** This work was funded by a Pilot and Feasibility Award from the  
 334 Cystic Fibrosis Foundations to CCB.

335

336 **Table 1. Antibiotic Resistance Genes – (Under whiB7 regulon)\***

337

| <b>Mab GENE</b> | <b>FC-<br/>Annotation<br/><math>\Delta rel</math><br/>vs.<br/>WT<br/>LOG</b> | <b>FDR-<br/>corrected<br/>P value<br/><math>\Delta rel</math> vs.<br/>WT<br/>LOG</b> | <b>FC-<br/><math>\Delta rel</math><br/>vs.WT<br/>Stat.</b> | <b>FDR-<br/>corrected<br/>P value<br/><math>\Delta rel</math> vs.<br/>WT<br/>Stat.</b> | <b>FC-<br/>WT.stat/<br/>WT.log</b> | <b>FDR-<br/>corrected<br/>P value<br/>WT.Log<br/>vs.<br/>WT.Stat</b> | <b>Mab GO. Mol. function</b> |
|-----------------|------------------------------------------------------------------------------|--------------------------------------------------------------------------------------|------------------------------------------------------------|----------------------------------------------------------------------------------------|------------------------------------|----------------------------------------------------------------------|------------------------------|
| MAB_0163c       | +2                                                                           | 1.1E-04                                                                              | +40                                                        | 5.1E-12                                                                                | +2                                 | 1.7E-311                                                             | Aminoglycoside               |

|           |      |         |       |          |      |          |                                                        |
|-----------|------|---------|-------|----------|------|----------|--------------------------------------------------------|
|           |      |         |       |          |      |          | Phosphotransferase                                     |
| MAB_0185c | +1   | 0.3     | +5.4  | 6.4E-03  | -5.4 | 0        | Arabinosyl<br>Transferase*                             |
| MAB_0186c | +1   | 0.8     | +9.7  | 1.8E-04  | -7.4 | 0        | Arabinosyl<br>Transferase*                             |
| MAB_1341  | +1   | 0.45    | +34   | 2.3E-11  | -1.3 | 5.5E-13  | Decarboxylase*                                         |
| MAB_1342  | +1.4 | 0.03    | +14   | 0        | -1   | 0        | Acyl-CoA synthetase*                                   |
| MAB_1395  | +2.7 | 1.3E-04 | +48   | 5.2E-10  | +1   | 7.2E-29  | Transporter*                                           |
| MAB_1396  | +2.5 | 3.7E-06 | +36   | 0        | -1   | 0        | Multidrug MFS transporter                              |
| MAB_1846  | -1.3 | 0.44    | +28   | 4.2E-06  | -1.4 | 2.9E-265 | ABC transporter*                                       |
| MAB_2273  | +2.3 | 8.8E-12 | +101  | 1.96E-08 | +2.2 | 0        | MFS transporter*                                       |
| MAB_2297  | +1.5 | 0.02    | +99.2 | 7.1E-08  | -2.1 | 0        | Methyltransferase-erm41*                               |
| MAB_2310  | +1.3 | 0.5     | +5.7  | 0.03     | +3.6 | 1.5E-50  | Multidrug transporter                                  |
| MAB_2355c | +2.2 | 1.5E-08 | +17   | 0        | +2.8 | 0        | ABC transporter*                                       |
| MAB_2396  | +2.1 | 8.2E-03 | +18   | 7.3E-09  | +1.5 | 4.5E-122 | Probably<br>acetyltransferase*                         |
| MAB_2640c | +1.2 | 0.122   | +5    | 5.4E-03  | -2.4 | 0        | Mmr - multidrug transport<br>integral membrane protein |
| MAB_2736c | +1   | 0.6     | +13   | 1.99E-10 | -3.7 | 0        | ABC transporter                                        |
| MAB_2780c | +1.7 | 0.01    | +27   | 1.14E-07 | +3.3 | 0        | MFS transporter*                                       |
| MAB_2807  | -1   | 0.7     | +5    | 4.4E-03  | -4.7 | 0        | MFS transporter                                        |



|           |      |         |      |         |       |          |                                            |
|-----------|------|---------|------|---------|-------|----------|--------------------------------------------|
| MAB_2875  | +5.4 | 9.7E-06 | +38  | 0       | +1.2  | 1.6E-171 | Beta-lactamase                             |
| MAB_2989  | +2   | 5.1E-04 | +6.8 | 2.9E-05 | +2.93 | 1.1E-222 | Chloramphenicol<br>acetyltransferase       |
| MAB_3042c | +2.7 | 1.9E-12 | +24  | 0       | +1.82 | 0        | GTpase-Hflx*                               |
| MAB_3467c | +6   | 2.5E-03 | +21  | 0       | +92   | 0        | Heat shock protein*                        |
| MAB_3508c | +1.8 | 0.3     | +31  | 0.08    | +14   | 0.38     | WhiB7                                      |
| MAB_3762  | +2   | 2.4E-09 | +11  | 2.9E-10 | +7.09 | 4.9E-143 | Membrane protein*                          |
| MAB_3869c | -1.3 | 0.158   | +6.7 | 5.4E-03 | -1.67 | 0        | DNA directed RNA<br>polymerase*            |
| MAB_4294  | +1.8 | 3.1E-03 | +28  | 0       | +1.88 | 0        | Aminotransferase*                          |
| MAB_4395  | +2.4 | 0       | +8   | 8.8E-07 | +1.1  | 0        | Aminoglycoside- 2'-N-<br>acetyltransferase |
| MAB_4837  | +4.6 | 0       | +26  | 0       | +1.84 | 1.9E-312 | Aminoglycoside<br>phosphotransferase       |

338

339

340

341

342

343 **Figures**

344

## Phenotypes of ppGpp<sup>0</sup> strains across clades

| Clades                            | Legend     |               |                | Conditions |           |       |        |             |         |             |           |     |
|-----------------------------------|------------|---------------|----------------|------------|-----------|-------|--------|-------------|---------|-------------|-----------|-----|
|                                   | same as wt | worse than wt | better than wt | Starvation | Oxidation | Acid  | Growth | Stat. phase | Biofilm | Antibiotics | Infection |     |
| <b>Proteobacteria</b>             |            |               |                |            |           |       |        |             |         |             |           |     |
| <i>C. crescentus</i> <sup>α</sup> | Red        |               |                |            |           |       | Green  |             |         |             |           |     |
| <i>R. palustris</i> <sup>α</sup>  |            |               |                |            |           |       |        | Red         |         |             |           |     |
| <i>B. pertussis</i> <sup>β</sup>  | Red        | Red           |                |            |           |       | Green  |             | Red     |             |           |     |
| <i>V. cholerae</i> <sup>γ</sup>   |            |               | Red            |            |           | Green |        |             | Red     | Red         |           |     |
| <i>H. ducreyi</i> <sup>†</sup>    |            | Red           |                |            |           |       | Green  |             |         |             | Red       |     |
| <i>E. coli</i> <sup>†</sup>       |            |               |                |            |           |       | Green  | Red         | Red     | Red         |           |     |
| <i>S. typhi</i> <sup>†</sup>      |            |               |                |            |           |       | Red    |             |         |             | Red       |     |
| <i>P. aeruginosa</i> <sup>‡</sup> |            | Red           |                |            |           |       |        |             |         |             | Red       | Red |
| <i>H. pylori</i> <sup>‡</sup>     | Green      |               | Red            |            |           | Blue  |        | Red         |         |             | Red       | Red |
| <b>Firmicutes</b>                 |            |               |                |            |           |       |        |             |         |             |           |     |
| <i>B. subtilis</i>                |            | Red           |                |            |           | Blue  |        | Red         |         |             |           |     |
| <i>E. faecalis</i>                |            |               |                |            |           | Blue  |        |             |         | Red         |           | Red |
| <i>S. aureus</i>                  |            |               |                |            |           | Red   |        |             |         |             |           |     |
| <i>C. difficile</i>               |            |               |                |            |           |       |        |             |         | Red         |           |     |
| <b>Actinobacteria</b>             |            |               |                |            |           |       |        |             |         |             |           |     |
| <i>M. tuberculosis</i>            | Red        | Blue          |                |            |           | Red   |        | Red         | Red     | Red         |           | Red |
| <i>M. abscessus</i>               | Blue       | Blue          | Blue           |            |           | Red   |        | Blue        |         | Green       |           | Red |

345 alpha-proteobacteria<sup>α</sup> beta-proteobacteria<sup>β</sup> gamma-proteobacteria<sup>γ</sup> epsilon-proteobacteria<sup>ε</sup>

346 **Figure 1. Survival or growth of ppGpp<sup>0</sup> strains from different species.** Summary of

347 published phenotypic data from ppGpp<sup>0</sup> strains (lacking all known factors that

348 synthesize (p)ppGpp) across several bacterial clades in different stress conditions. **Blue**

349 squares represent species in which the ppGpp<sup>0</sup> phenotype was the same as the wild-

350 type strain. **Red** squares indicate that the ppGpp<sup>0</sup> strain either grows more slowly or

351 survives less than wild-type strain in the indicated condition. **Green** squares indicate

352 that the ppGpp<sup>0</sup> strain either grows more rapidly or survives better than the wild-type

353 strain in the indicated condition. Data for *Mycobacterium abscessus* is shown in this

354 paper. (Sokawa *et al.*, 1975; Gentry *et al.*, 2000; Primm *et al.*, 2000; Balzer and

355 McLean, 2002; Mouery et al., 2006; Nanamiya et al., 2007; Lesley and Shapiro, 2008;  
356 Zhou et al., 2008; Abranches et al., 2009; Boutte and Crosson, 2011; Potrykus et al.,  
357 2011; Vogt et al., 2011; He et al., 2012; Sugisaki et al., 2013; Gaca et al., 2013; Holley  
358 et al., 2014; Oh et al., 2015; Xu et al., 2016; Harms et al., 2017; Kim et al., 2018;  
359 Dasgupta et al., 2019; Yin et al., 2019; Schäfer et al., 2020; Pokhrel et al., 2020)  
360  
361

### A. Survival during carbon starvation

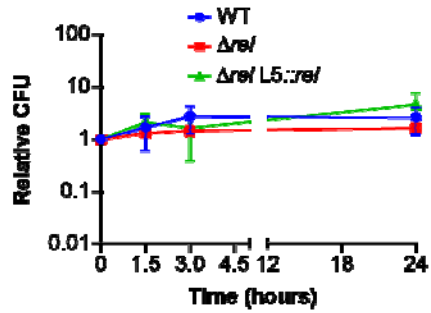

### B. Survival in acidic medium

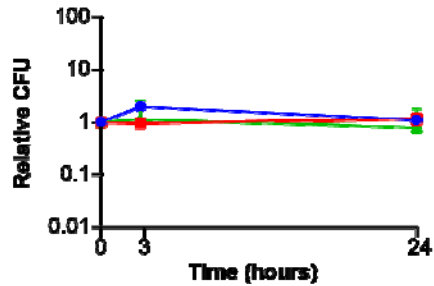

### C. Survival during osmotic stress

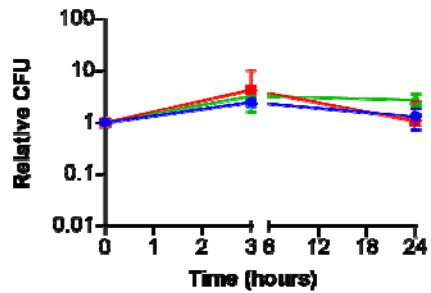

### D. Survival during oxidative stress

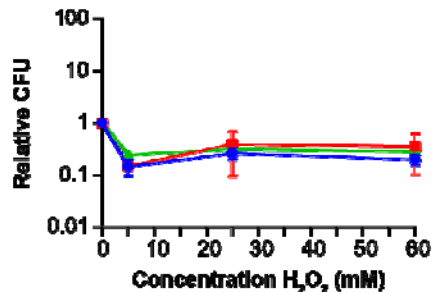

362

363 **Figure 2. Contribution of  $rel_{Mab}$  to survival in various stresses. (A) CFU of wild-type**

364 *Mycobacterium abscessus* ATCC19977 (blue),  $\blacktriangle$   $rel_{Mab}$  mutant (red), and the

365 complemented strain  $\blacktriangle$   $rel L5::rel$  (green) in Hartman's du Bont medium with no glycerol

366 and Tyloxapol as a detergent. (B) CFU in 7H9 Middlebrook medium with a pH of 4. (C)  
367 CFU in Lennox LB with 1M of NaCl. (D) CFU in Hartmans du Bont medium with 5mM,  
368 25mM or 60mM of tert-butyl peroxide after 24 hours. Relative CFU is calculated by  
369 taking the ratio between each CFU value and the initial CFU value at time zero. All data  
370 points are an average of three biological replicates. Error bars represent standard  
371 deviation. There are no significant differences in any of these data by a two-tailed t-test.  
372

### A. Survival in stationary phase

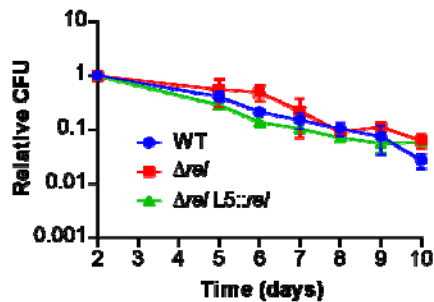

### B. Growth in 7H9

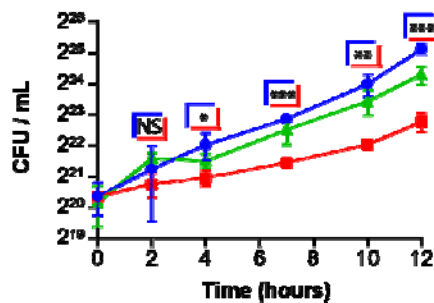

373

374 **Figure 3. Growth and stationary phase survival of  $\Delta rel_{Mab}$ .** (A) CFU in stationary  
375 phase in 7H9 media. The 2 day time point is 48 hours after diluting log. phase cultures  
376 to OD=0.05. (B) CFU during log. phase growth in 7H9 medium. Graph is set at a log<sub>2</sub>  
377 scale. P values are for the wild-type compared to the  $\Delta rel$  strain. P values for T=4,  $P =$   
378 0.0415; T=7,  $P = 0.00015$ ; T=10,  $P = 0.006$ ; T=12,  $P = 0.00029$ . P-values between wild-  
379 type and the complemented strain were not significant.

380

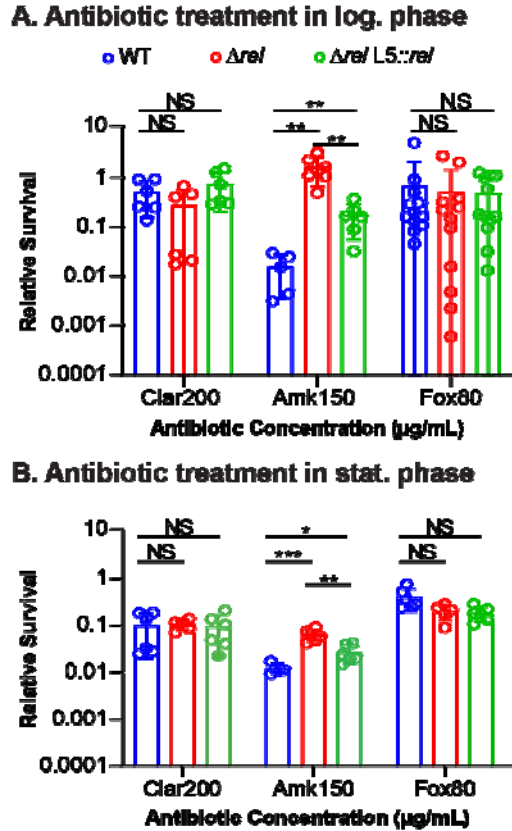

381

382

383 **Figure 4. Contribution of  $rel_{Mab}$  to survival in antibiotic treatment.** Relative CFUs of  
384  $Mab$  strain treated with either 200 $\mu\text{g/mL}$  of clarithromycin, 150  $\mu\text{g/mL}$  of amikacin, or 80  
385  $\mu\text{g/mL}$  of cefoxitin for either (A) 48 hours in log. phase or (B) 72 hours in stationary  
386 phase. Relative CFU is calculated by taking the ratio between each CFU and the initial  
387 CFU value at time zero The bars represent the mean of 6-9 biological replicates, the  
388 individual values are shown by the dots. Error bars represent standard deviation. Log.  
389 phase P values: (Amk150) WT vs  $\Delta rel$  = 0.005; WT vs.  $\Delta rel L5::rel$  = 0.01;  $\Delta rel$  vs.  $\Delta rel$   
390  $L5::rel$  = 0.004 . Stationary phase P values: (AMK150) WT vs  $\Delta rel$  = 0.00017; WT vs.  
391  $\Delta rel L5::rel$  = 0.0217;  $\Delta rel$  vs.  $\Delta rel L5::rel$  = 0.0017. Asterisks represent significance as

392 measured by the two-tailed student's  $t$ -test; \* =  $P \leq 0.05$  ; \*\* =  $P \leq 0.01$  ; \*\*\* =  $P \leq$

393 0.001; n.s. =  $P > 0.05$ .

394

395

396

397

398

399

400

401

402

403

404

405

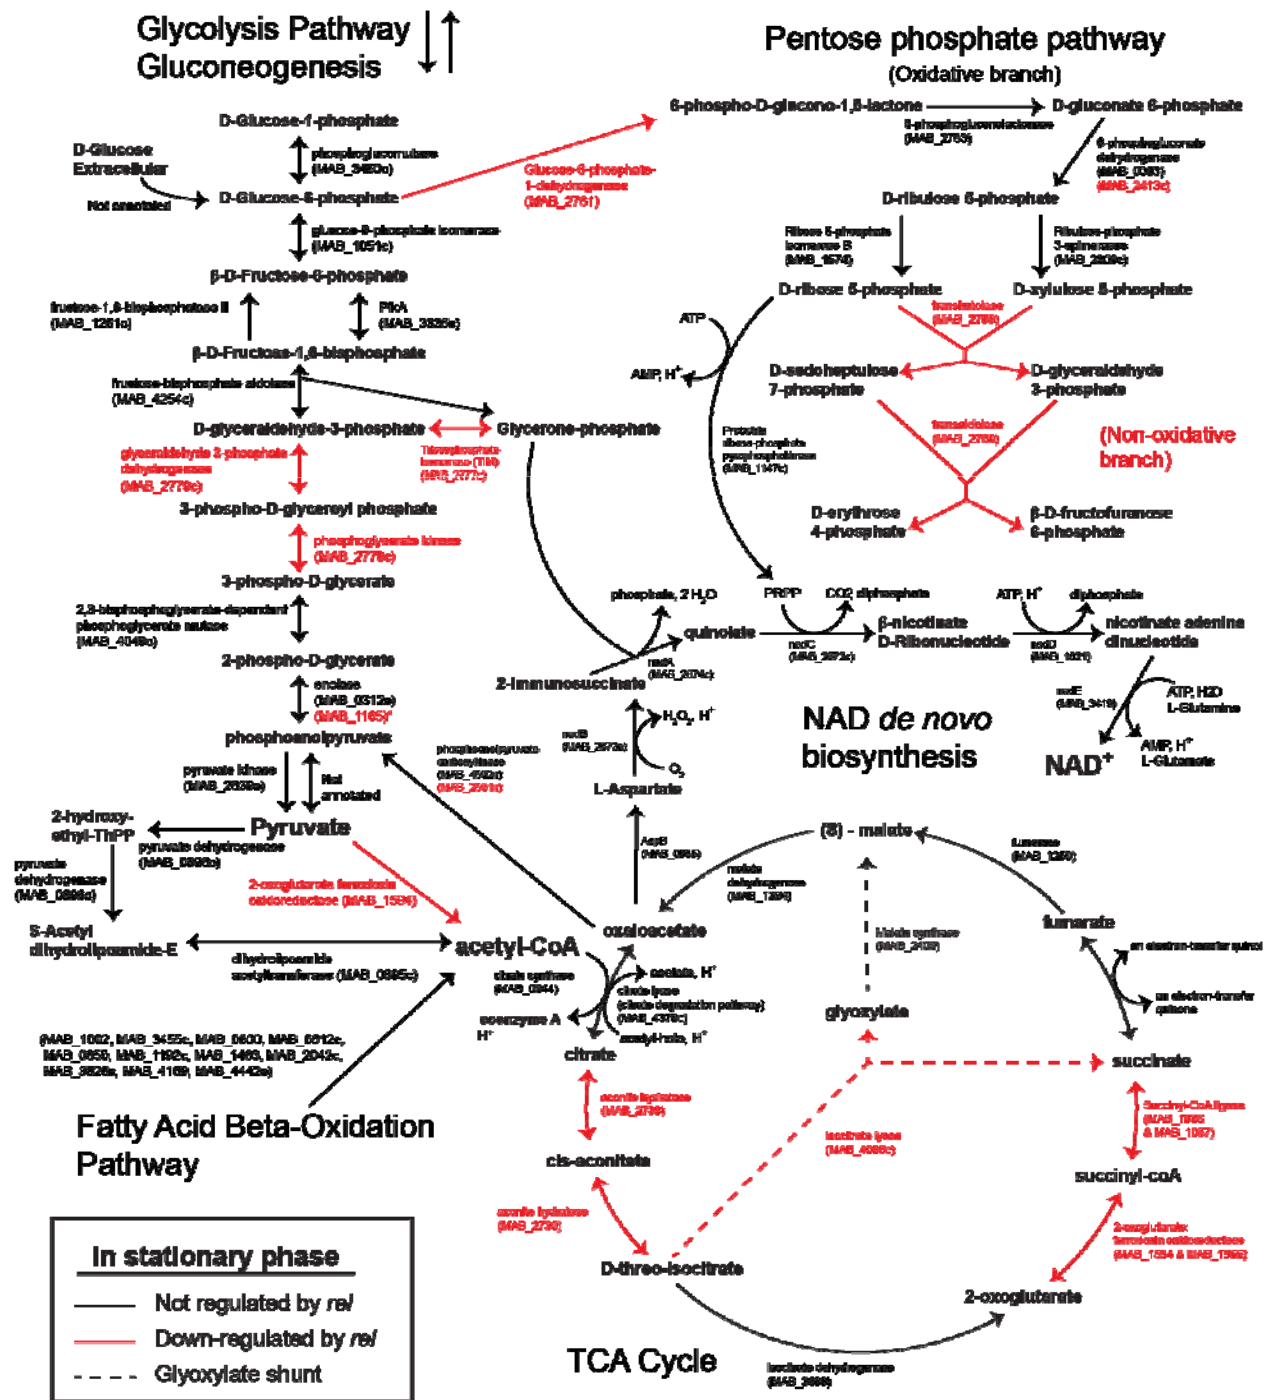

406

407 **Figure 5. Repression of central metabolic genes by Rel.** Genes in red are

408 downregulated by Rel at least 3-fold in stationary phase,  $P < 0.05$ . Genes in black are

409 not significantly regulated by Rel in stationary phase. See Table S3 for data.

410



411

412

413

414

415 **References**

416

417

- 418 1. Dahl JL, Kraus CN, Boshoff HIM, Doan B, Foley K, Avarbock D, Kaplan G, Mizrahi  
419 V, Rubin H, Barry CE. 2003. The role of RelMtb-mediated adaptation to stationary  
420 phase in long-term persistence of Mycobacterium tuberculosis in mice.  
421 Proceedings of the National Academy of Sciences 100:10026–10031.
- 422 2. Traxler MF, Summers SM, Nguyen H-T, Zacharia VM, Hightower GA, Smith JT,  
423 Conway T. 2008. The global, ppGpp-mediated stringent response to amino acid  
424 starvation in Escherichia coli. Molecular Microbiology 68:1128–1148.
- 425 3. Boutte CC, Crosson S. 2011. The complex logic of stringent response regulation  
426 in Caulobacter crescentus: starvation signalling in an oligotrophic environment.  
427 Molecular Microbiology 80:695–714.
- 428 4. Hauryliuk V, Atkinson GC, Murakami KS, Tenson T, Gerdes K. 2015. Recent  
429 functional insights into the role of (p)ppGpp in bacterial physiology. Nat Rev  
430 Microbiol 13:298–309.

- 431 5. Harms A, Fino C, Sørensen MA, Semsey S, Gerdes K. 2017. Prophages and  
432 Growth Dynamics Confound Experimental Results with Antibiotic-Tolerant  
433 Persister Cells. *mBio* 8.
- 434 6. Johansen MD, Herrmann J-L, Kremer L. 2020. Non-tuberculous mycobacteria and  
435 the rise of *Mycobacterium abscessus*. *Nat Rev Microbiol*  
436 <https://doi.org/10.1038/s41579-020-0331-1>.
- 437 7. Nessar R, Cambau E, Reyrat JM, Murray A, Gicquel B. 2012. *Mycobacterium*  
438 *abscessus*: a new antibiotic nightmare. *Journal of Antimicrobial Chemotherapy*  
439 67:810–818.
- 440 8. Clary G, Sasindran SJ, Nesbitt N, Mason L, Cole S, Azad A, McCoy K,  
441 Schlesinger LS, Hall-Stoodley L. 2018. *Mycobacterium abscessus* Smooth and  
442 Rough Morphotypes Form Antimicrobial-Tolerant Biofilm Phenotypes but Are  
443 Killed by Acetic Acid. *Antimicrobial Agents and Chemotherapy* 62.
- 444 9. Hunt-Serracin AC, Parks BJ, Boll J, Boutte C. 2019. Biofilm-associated  
445 *Mycobacterium abscessus* cells have altered antibiotic tolerance and surface  
446 glycolipids in Artificial Cystic Fibrosis Sputum Media. *Antimicrobial Agents and*  
447 *Chemotherapy* AAC.02488-18.
- 448 10. Wexselblatt E, Oppenheimer-Shaanan Y, Kaspy I, London N, Schueler-Furman O,  
449 Yavin E, Glaser G, Katzhendler J, Ben-Yehuda S. 2012. Relacin, a Novel  
450 Antibacterial Agent Targeting the Stringent Response. *PLOS Pathogens*  
451 8:e1002925.

- 452 11. Dutta NK, Klinkenberg LG, Vazquez M-J, Segura-Carro D, Colmenarejo G,  
453 Ramon F, Rodriguez-Miquel B, Mata-Cantero L, Porras-De Francisco E, Chuang  
454 Y-M, Rubin H, Lee JJ, Eoh H, Bader JS, Perez-Herran E, Mendoza-Losana A,  
455 Karakousis PC. 2019. Inhibiting the stringent response blocks *Mycobacterium*  
456 *tuberculosis* entry into quiescence and reduces persistence. *Science Advances*  
457 5:eaav2104.
- 458 12. Hobbs JK, Boraston AB. 2019. (p)ppGpp and the Stringent Response: An  
459 Emerging Threat to Antibiotic Therapy. *ACS Infect Dis* 5:1505–1517.
- 460 13. Pacios O, Blasco L, Bleriot I, Fernandez-Garcia L, Ambroa A, López M, Bou G,  
461 Cantón R, Garcia-Contreras R, Wood TK, Tomás M. 2020. (p)ppGpp and Its Role  
462 in Bacterial Persistence: New Challenges. *Antimicrob Agents Chemother*  
463 64:e01283-20, /aac/64/10/AAC.01283-20.atom.
- 464 14. Barker MM, Gaal T, Josaitis CA, Gourse RL. 2001. Mechanism of regulation of  
465 transcription initiation by ppGpp. I. Effects of ppGpp on transcription initiation in  
466 vivo and in vitro<sup>1</sup> Edited by R. Ebright. *Journal of Molecular Biology* 305:673–  
467 688.
- 468 15. Barker MM, Gaal T, Gourse RL. 2001. Mechanism of regulation of transcription  
469 initiation by ppGpp. II. Models for positive control based on properties of RNAP  
470 mutants and competition for RNAP<sup>11</sup> Edited by R. Ebright. *Journal of Molecular*  
471 *Biology* 305:689–702.

- 472 16. Krásný L, Gourse RL. 2004. An alternative strategy for bacterial ribosome  
473 synthesis: *Bacillus subtilis* rRNA transcription regulation. *EMBO J* 23:4473–4483.
- 474 17. Krásný L, Tišerová H, Jonák J, Rejman D, Šanderová H. 2008. The identity of the  
475 transcription +1 position is crucial for changes in gene expression in response to  
476 amino acid starvation in *Bacillus subtilis*. *Molecular Microbiology* 69:42–54.
- 477 18. Maciąg M, Kochanowska M, Łyżeń R, Węgrzyn G, Szalewska-Pałasz A. 2010.  
478 ppGpp inhibits the activity of *Escherichia coli* DnaG primase. *Plasmid* 63:61–67.
- 479 19. Kraemer JA, Sanderlin AG, Laub MT. 2019. The Stringent Response Inhibits DNA  
480 Replication Initiation in *E. coli* by Modulating Supercoiling of *oriC*. *mBio*  
481 10:e01330-19, /mbio/10/4/mBio.01330-19.atom.
- 482 20. Kriel A, Bittner AN, Kim SH, Liu K, Tehranchi AK, Zou WY, Rendon S, Chen R, Tu  
483 BP, Wang JD. 2012. Direct Regulation of GTP Homeostasis by (p)ppGpp: A  
484 Critical Component of Viability and Stress Resistance. *Molecular Cell* 48:231–241.
- 485 21. Wang B, Dai P, Ding D, Del Rosario A, Grant RA, Pentelute BL, Laub MT. 2019.  
486 Affinity-based capture and identification of protein effectors of the growth regulator  
487 ppGpp. 2. *Nature Chemical Biology* 15:141–150.
- 488 22. Wang B, Grant RA, Laub MT. 2020. ppGpp Coordinates Nucleotide and Amino-  
489 Acid Synthesis in *E. coli* During Starvation. *Molecular Cell* S1097276520305487.

- 490 23. Fan H, Hahm J, Diggs S, Perry JJP, Blaha G. 2015. Structural and Functional  
491 Analysis of BipA, a Regulator of Virulence in Enteropathogenic *Escherichia coli*. *J*  
492 *Biol Chem* 290:20856–20864.
- 493 24. Corrigan RM, Bellows LE, Wood A, Gründling A. 2016. ppGpp negatively impacts  
494 ribosome assembly affecting growth and antimicrobial tolerance in Gram-positive  
495 bacteria. *Proc Natl Acad Sci USA* 113:E1710–E1719.
- 496 25. Rojas A-M, Ehrenberg M, Andersson SGE, Kurland CG. 1984. ppGpp inhibition of  
497 elongation factors Tu, G and Ts during polypeptide synthesis. *Mol Gen Genet*  
498 197:36–45.
- 499 26. Milon P, Tischenko E, Tomsic J, Caserta E, Folkers G, La Teana A, Rodnina MV,  
500 Pon CL, Boelens R, Gualerzi CO. 2006. The nucleotide-binding site of bacterial  
501 translation initiation factor 2 (IF2) as a metabolic sensor. *Proceedings of the*  
502 *National Academy of Sciences* 103:13962–13967.
- 503 27. Mitkevich VA, Ermakov A, Kulikova AA, Tankov S, Shyp V, Soosaar A, Tenson T,  
504 Makarov AA, Ehrenberg M, Haurlyuk V. 2010. Thermodynamic Characterization  
505 of ppGpp Binding to EF-G or IF2 and of Initiator tRNA Binding to Free IF2 in the  
506 Presence of GDP, GTP, or ppGpp. *Journal of Molecular Biology* 402:838–846.
- 507 28. Boutte CC, Crosson S. 2013. Bacterial lifestyle shapes stringent response  
508 activation. *Trends in Microbiology* 21:174–180.
- 509 29. Surányi G, Korcz A, Pálfi Z, Borbély G. 1987. Effects of light deprivation on RNA  
510 synthesis, accumulation of guanosine 3'(2')-diphosphate 5'-diphosphate, and

- 511 protein synthesis in heat-shocked *Synechococcus* sp. strain PCC 6301, a  
512 cyanobacterium. *Journal of Bacteriology* 169:632–639.
- 513 30. Hood RD, Higgins SA, Flamholz A, Nichols RJ, Savage DF. 2016. The stringent  
514 response regulates adaptation to darkness in the cyanobacterium *Synechococcus*  
515 *elongatus*. *Proceedings of the National Academy of Sciences* 113:E4867–E4876.
- 516 31. Cashel M, Gallant J. 1969. Two Compounds implicated in the Function of the RC  
517 Gene of *Escherichia coli*. *Nature* 221:838.
- 518 32. Winther KS, Roghanian M, Gerdes K. 2018. Activation of the Stringent Response  
519 by Loading of RelA-tRNA Complexes at the Ribosomal A-Site. *Molecular Cell*  
520 70:95-105.e4.
- 521 33. Battesti A, Bouveret E. 2006. Acyl carrier protein/SpoT interaction, the switch  
522 linking SpoT-dependent stress response to fatty acid metabolism. *Molecular*  
523 *Microbiology* 62:1048–1063.
- 524 34. Germain E, Guiraud P, Byrne D, Douzi B, Djendli M, Maisonneuve E. 2019. YtfK  
525 activates the stringent response by triggering the alarmone synthetase SpoT in  
526 *Escherichia coli*. *Nat Commun* 10:5763.
- 527 35. Schofield WB, Zimmermann-Kogadeeva M, Zimmermann M, Barry NA, Goodman  
528 AL. 2018. The Stringent Response Determines the Ability of a Commensal  
529 Bacterium to Survive Starvation and to Persist in the Gut. *Cell Host & Microbe*  
530 24:120-132.e6.

- 531 36. Primm TP, Andersen SJ, Mizrahi V, Avarbock D, Rubin H, Barry CE. 2000. The  
532 Stringent Response of *Mycobacterium tuberculosis* Is Required for Long-Term  
533 Survival. *Journal of Bacteriology* 182:4889–4898.
- 534 37. Eymann C, Homuth G, Scharf C, Hecker M. 2002. *Bacillus subtilis* functional  
535 genomics: global characterization of the stringent response by proteome and  
536 transcriptome analysis. *JB* 184:2500–2520.
- 537 38. Potrykus K, Murphy H, Philippe N, Cashel M. 2011. ppGpp is the major source of  
538 growth rate control in *E. coli*. *Environmental Microbiology* 13:563–575.
- 539 39. Weiss LA, Stallings CL. 2013. Essential Roles for *Mycobacterium tuberculosis* Rel  
540 beyond the Production of (p)ppGpp. *Journal of Bacteriology* 195:5629–5638.
- 541 40. Pulschen AA, Sastre DE, Machinandiarena F, Asis AC, Albanesi D, Mendoza D  
542 de, Gueiros-Filho FJ. 2017. The stringent response plays a key role in *Bacillus*  
543 *subtilis* survival of fatty acid starvation. *Molecular Microbiology* 103:698–712.
- 544 41. Murch AL, Skipp PJ, Roach PL, Oyston PCF. 2017. Whole genome  
545 transcriptomics reveals global effects including up-regulation of *Francisella*  
546 pathogenicity island gene expression during active stringent response in the  
547 highly virulent *Francisella tularensis* subsp. *tularensis* SCHU S4. *Microbiology*  
548 163:1664–1679.
- 549 42. Schäfer H, Beckert B, Frese CK, Steinchen W, Nuss AM, Beckstette M, Hantke I,  
550 Driller K, Sudzinová P, Krásný L, Kaeffer V, Dersch P, Bange G, Wilson DN,

- 551 Turgay K. 2020. The alarmones (p)ppGpp are part of the heat shock response of  
552 *Bacillus subtilis*. PLoS Genet 16:e1008275.
- 553 43. Brauner A, Fridman O, Gefen O, Balaban NQ. 2016. Distinguishing between  
554 resistance, tolerance and persistence to antibiotic treatment. Nature Reviews  
555 Microbiology 14:320–330.
- 556 44. Tuomanen E, Cozens R, Tosch W, Zak O, Tomaz A. 1986. The Rate of Killing of  
557 *Escherichia coli* by P-Lactam Antibiotics Is Strictly Proportional to the Rate of  
558 Bacterial Growth. Journal of General Microbiology 132:1297–1304.
- 559 45. Gao W, Chua K, Davies JK, Newton HJ, Seemann T, Harrison PF, Holmes NE,  
560 Rhee H-W, Hong J-I, Hartland EL, Stinear TP, Howden BP. 2010. Two Novel  
561 Point Mutations in Clinical *Staphylococcus aureus* Reduce Linezolid Susceptibility  
562 and Switch on the Stringent Response to Promote Persistent Infection. PLoS  
563 Pathog 6:e1000944.
- 564 46. Honsa ES, Cooper VS, Mhaisien MN, Frank M, Shaker J, Iverson A, Rubnitz J,  
565 Hayden RT, Lee RE, Rock CO, Tuomanen EI, Wolf J, Rosch JW. 2017. RelA  
566 Mutant *Enterococcus faecium* with Multiantibiotic Tolerance Arising in an  
567 Immunocompromised Host. mBio 8:mBio.02124-16, e02124-16.
- 568 47. Korch SB, Henderson TA, Hill TM. 2003. Characterization of the hipA7 allele of  
569 *Escherichia coli* and evidence that high persistence is governed by (p)ppGpp  
570 synthesis. Molecular Microbiology 50:1199–1213.



- 571 48. Geiger T, Kästle B, Gratani FL, Goerke C, Wolz C. 2014. Two Small (p)ppGpp  
572 Synthases in *Staphylococcus aureus* Mediate Tolerance against Cell Envelope  
573 Stress Conditions. *J Bacteriol* 196:894–902.
- 574 49. Stallings CL, Stephanou NC, Chu L, Hochschild A, Nickels BE, Glickman MS.  
575 2009. CarD Is an Essential Regulator of rRNA Transcription Required for  
576 *Mycobacterium tuberculosis* Persistence. *Cell* 138:146–159.
- 577 50. Klinkenberg LG, Lee J, Bishai WR, Karakousis PC. 2010. The Stringent Response  
578 Is Required for Full Virulence of *Mycobacterium tuberculosis* in Guinea Pigs. *J*  
579 *INFECT DIS* 202:1397–1404.
- 580 51. Prusa J, Zhu DX, Stallings CL. 2018. The stringent response and *Mycobacterium*  
581 *tuberculosis* pathogenesis. *Pathogens and Disease*; Oxford 76.
- 582 52. Nanamiya H, Kasai K, Nozawa A, Yun C-S, Narisawa T, Murakami K, Natori Y,  
583 Kawamura F, Tozawa Y. 2007. Identification and functional analysis of novel  
584 (p)ppGpp synthetase genes in *Bacillus subtilis*: Novel (p)ppGpp synthetase genes  
585 in *B. subtilis*. *Molecular Microbiology* 67:291–304.
- 586 53. Sugisaki K, Hanawa T, Yonezawa H, Osaki T, Fukutomi T, Kawakami H,  
587 Yamamoto T, Kamiya S. 2013. Role of (p)ppGpp in biofilm formation and  
588 expression of filamentous structures in *Bordetella pertussis*. *Microbiology*  
589 159:1379–1389.

- 590 54. Oh YT, Lee K-M, Bari W, Raskin DM, Yoon SS. 2015. (p)ppGpp, a Small  
591 Nucleotide Regulator, Directs the Metabolic Fate of Glucose in *Vibrio cholerae*. J  
592 Biol Chem 290:13178–13190.
- 593 55. Boutte CC, Henry JT, Crosson S. 2012. ppGpp and Polyphosphate Modulate Cell  
594 Cycle Progression in *Caulobacter crescentus*. Journal of Bacteriology 194:28–35.
- 595 56. Kim J-S, Liu L, Fitzsimmons LF, Wang Y, Crawford MA, Mastrogiovanni M, Trujillo  
596 M, Till JKA, Radi R, Dai S, Vázquez-Torres A. 2018. DksA–DnaJ redox  
597 interactions provide a signal for the activation of bacterial RNA polymerase.  
598 Proceedings of the National Academy of Sciences 115:E11780–E11789.
- 599 57. Sokawa Y, Sokawa J, Kaziro Y. 1975. Regulation of stable RNA synthesis and  
600 ppGpp levels in growing cells of *Escherichia coli*. Cell 5:69–74.
- 601 58. Gaca AO, Kajfasz JK, Miller JH, Liu K, Wang JD, Abranches J, Lemos JA. 2013.  
602 Basal Levels of (p)ppGpp in *Enterococcus faecalis*: the Magic beyond the  
603 Stringent Response. mBio 4:e00646-13.
- 604 59. Novosad SA, Beekmann SE, Polgreen PM, Mackey K, Winthrop KL. 2016.  
605 Treatment of *Mycobacterium abscessus* Infection. Emerg Infect Dis 22:511–514.
- 606 60. Nash KA, Brown-Elliott BA, Wallace RJ. 2009. A Novel Gene, erm(41), Confers  
607 Inducible Macrolide Resistance to Clinical Isolates of *Mycobacterium abscessus*  
608 but Is Absent from *Mycobacterium chelonae*. AAC 53:1367–1376.

- 609 61. Cabral DJ, Wurster JI, Belenky P. 2018. Antibiotic Persistence as a Metabolic  
610 Adaptation: Stress, Metabolism, the Host, and New Directions. Pharmaceuticals  
611 (Basel) 11.
- 612 62. Fenn K, Wong CT, Darbari VC. 2020. Mycobacterium tuberculosis Uses Mce  
613 Proteins to Interfere With Host Cell Signaling. Front Mol Biosci 6:149.
- 614 63. Soroka D, Dubee V, Soulier-Escrihuela O, Cuinet G, Hugonnet J-E, Gutmann L,  
615 Mainardi J-L, Arthur M. 2014. Characterization of broad-spectrum Mycobacterium  
616 abscessus class A -lactamase. Journal of Antimicrobial Chemotherapy 69:691–  
617 696.
- 618 64. Hurst-Hess K, Rudra P, Ghosh P. 2017. Mycobacterium abscessus WhiB7  
619 Regulates a Species-Specific Repertoire of Genes To Confer Extreme Antibiotic  
620 Resistance. Antimicrobial Agents and Chemotherapy 61.
- 621 65. Brockmann-Gretza O, Kalinowski J. 2006. Global gene expression during  
622 stringent response in Corynebacterium glutamicum in presence and absence of  
623 the rel gene encoding (p)ppGpp synthase. BMC Genomics 7:230.
- 624 66. Traxler MF, Summers SM, Nguyen H-T, Zacharia VM, Hightower GA, Smith JT,  
625 Conway T. 2008. The global, ppGpp-mediated stringent response to amino acid  
626 starvation in Escherichia coli. Molecular Microbiology 68:1128–1148.
- 627 67. Vercruyse M, Fauvart M, Jans A, Beullens S, Braeken K, Cloots L, Engelen K,  
628 Marchal K, Michiels J. 2011. Stress response regulators identified through

- 629 genome-wide transcriptome analysis of the (p)ppGpp-dependent response in  
630 *Rhizobium etli*. *Genome Biol* 12:R17.
- 631 68. Yang H, Yu M, Lee JH, Chatnaparat T, Zhao Y. 2020. The stringent response  
632 regulator (p) ppGpp mediates virulence gene expression and survival in *Erwinia*  
633 *amylovora*. *BMC Genomics* 21:261.
- 634 69. Njire M, Wang N, Wang B, Tan Y, Cai X, Liu Y, Mugweru J, Guo J, Hameed HMA,  
635 Tan S, Liu J, Yew WW, Nuermberger E, Lamichhane G, Liu J, Zhang T. 2017.  
636 Pyrazinoic Acid Inhibits a Bifunctional Enzyme in *Mycobacterium tuberculosis*.  
637 *Antimicrob Agents Chemother* 61:e00070-17, e00070-17.
- 638 70. Petchiappan A, Naik SY, Chatterji D. 2019. RelZ-mediated stress response in  
639 *Mycobacterium smegmatis*: pGpp synthesis and its regulation. *J Bacteriol*  
640 JB.00444-19, jb;JB.00444-19v1.
- 641 71. Rodríguez JG, Hernández AC, Helguera-Repetto C, Aguilar Ayala D,  
642 Guadarrama-Medina R, Anzóla JM, Bustos JR, Zambrano MM, González-y-  
643 Merchand J, García MJ, Del Portillo P. 2014. Global Adaptation to a Lipid  
644 Environment Triggers the Dormancy-Related Phenotype of *Mycobacterium*  
645 *tuberculosis*. *mBio* 5:e01125-14.
- 646 72. Wilburn KM, Fieweger RA, VanderVen BC. 2018. Cholesterol and fatty acids  
647 grease the wheels of *Mycobacterium tuberculosis* pathogenesis. *Pathogens and*  
648 *Disease* 14.

- 649 73. Dubois V, Pawlik A, Bories A, Le Moigne V, Sismeiro O, Legendre R, Varet H,  
650 Rodríguez-Ordóñez M del P, Gaillard J-L, Coppée J-Y, Brosch R, Herrmann J-L,  
651 Girard-Misguich F. 2019. Mycobacterium abscessus virulence traits unraveled by  
652 transcriptomic profiling in amoeba and macrophages. PLoS Pathog 15:e1008069.
- 653 74. Koskiniemi S, Pránting M, Gullberg E, Näsval J, Andersson DI. 2011. Activation  
654 of cryptic aminoglycoside resistance in Salmonella enterica: Activation of cryptic  
655 resistance. Molecular Microbiology 80:1464–1478.
- 656 75. Aedo S, Tomasz A. 2016. Role of the Stringent Stress Response in the Antibiotic  
657 Resistance Phenotype of Methicillin-Resistant Staphylococcus aureus. Antimicrob  
658 Agents Chemother 60:2311–2317.
- 659 76. Jayasingam S, Zin T, Ngeow Y. 2017. Antibiotic resistance in Mycobacterium  
660 Abscessus and Mycobacterium Fortuitum isolates from Malaysian patients. Int J  
661 Mycobacteriol 6:387.
- 662 77. Luthra S, Rominski A, Sander P. 2018. The Role of Antibiotic-Target-Modifying  
663 and Antibiotic-Modifying Enzymes in Mycobacterium abscessus Drug Resistance.  
664 Front Microbiol 9.
- 665 78. Bar-On O, Mussaffi H, Mei-Zahav M, Prais D, Steuer G, Stafler P, Hananya S,  
666 Blau H. 2015. Increasing nontuberculous mycobacteria infection in cystic fibrosis.  
667 Journal of Cystic Fibrosis 14:53–62.

- 668 79. Parker H, Lorenc R, Ruelas Castillo J, Karakousis PC. 2020. Mechanisms of  
669 Antibiotic Tolerance in Mycobacterium avium Complex: Lessons From Related  
670 Mycobacteria. *Front Microbiol* 11.
- 671 80. Halstrom S, Price P, Thomson R. 2015. Review: Environmental mycobacteria as a  
672 cause of human infection. *International Journal of Mycobacteriology* 4:81–91.
- 673 81. Hall BG, Barlow M. 2004. Evolution of the serine  $\beta$ -lactamases: past, present and  
674 future. *Drug Resistance Updates* 7:111–123.
- 675 82. Perry J, Waglechner N, Wright G. 2016. The Prehistory of Antibiotic Resistance.  
676 *Cold Spring Harb Perspect Med* 6:a025197.
- 677 83. Waglechner N, McArthur AG, Wright GD. 2019. Phylogenetic reconciliation  
678 reveals the natural history of glycopeptide antibiotic biosynthesis and resistance.  
679 *Nat Microbiol* 4:1862–1871.
- 680 84. Durand GA, Raoult D, Dubourg G. 2019. Antibiotic discovery: history, methods  
681 and perspectives. *International Journal of Antimicrobial Agents* 53:371–382.
- 682 85. van Kessel JC, Hatfull GF. 2007. Recombineering in Mycobacterium tuberculosis.  
683 *Nat Methods* 4:147–152.
- 684 86. Kieser KJ, Boutte CC, Kester JC, Baer CE, Barczak AK, Meniche X, Chao MC,  
685 Rego EH, Sasseti CM, Fortune SM, Rubin EJ. 2015. Phosphorylation of the  
686 Peptidoglycan Synthase PonA1 Governs the Rate of Polar Elongation in  
687 Mycobacteria. *PLOS Pathogens* 11:e1005010.

- 688 87. Hartmans S, de Bont JAM, Stackebrandt E. 2006. The Genus *Mycobacterium*--  
689 Nonmedical, p. 889–918. *In* Dworkin, M, Falkow, S, Rosenberg, E, Schleifer, K-H,  
690 Stackebrandt, E (eds.), *The Prokaryotes*. Springer New York, New York, NY.
- 691 88. Shell SS, Prestwich EG, Baek S-H, Shah RR, Sasseti CM, Dedon PC, Fortune  
692 SM. 2013. DNA Methylation Impacts Gene Expression and Ensures Hypoxic  
693 Survival of *Mycobacterium tuberculosis*. *PLoS Pathog* 9:e1003419.
- 694 89. Gentry D, Li T, Rosenberg M, McDevitt D. 2000. The *rel* Gene Is Essential for *In*  
695 *Vitro* Growth of *Staphylococcus aureus*. *J Bacteriol* 182:4995–4997.
- 696 90. Balzer GJ, McLean RJC. 2002. The stringent response genes *relA* and *spoT* are  
697 important for *Escherichia coli* biofilms under slow-growth conditions 48:6.
- 698 91. Mouery K, Rader BA, Gaynor EC, Guillemin K. 2006. The Stringent Response Is  
699 Required for *Helicobacter pylori* Survival of Stationary Phase, Exposure to Acid,  
700 and Aerobic Shock. *JB* 188:5494–5500.
- 701 92. Lesley JA, Shapiro L. 2008. *SpoT* Regulates *DnaA* Stability and Initiation of DNA  
702 Replication in Carbon-Starved *Caulobacter crescentus*. *Journal of Bacteriology*  
703 190:6867–6880.
- 704 93. Zhou YN, Coleman WG, Yang Z, Yang Y, Hodgson N, Chen F, Jin DJ. 2008.  
705 Regulation of Cell Growth during Serum Starvation and Bacterial Survival in  
706 Macrophages by the Bifunctional Enzyme *SpoT* in *Helicobacter pylori*. *JB*  
707 190:8025–8032.

- 708 94. Abranches J, Martinez AR, Kajfasz JK, Chávez V, Garsin DA, Lemos JA. 2009.  
709 The Molecular Alarmone (p)ppGpp Mediates Stress Responses, Vancomycin  
710 Tolerance, and Virulence in *Enterococcus faecalis*. *JB* 191:2248–2256.
- 711 95. Vogt SL, Green C, Stevens KM, Day B, Erickson DL, Woods DE, Storey DG.  
712 2011. The Stringent Response Is Essential for *Pseudomonas aeruginosa*  
713 Virulence in the Rat Lung Agar Bead and *Drosophila melanogaster* Feeding  
714 Models of Infection. *Infect Immun* 79:4094–4104.
- 715 96. He H, Cooper JN, Mishra A, Raskin DM. 2012. Stringent Response Regulation of  
716 Biofilm Formation in *Vibrio cholerae*. *Journal of Bacteriology* 194:2962–2972.
- 717 97. Holley C, Gangaiah D, Li W, Fortney KR, Janowicz DM, Ellinger S, Zwickl B, Katz  
718 BP, Spinola SM. 2014. A (p)ppGpp-Null Mutant of *Haemophilus ducreyi* Is  
719 Partially Attenuated in Humans Due to Multiple Conflicting Phenotypes. *Infect*  
720 *Immun* 82:3492–3502.
- 721 98. Xu X, Yu H, Zhang D, Xiong J, Qiu J, Xin R, He X, Sheng H, Cai W, Jiang L,  
722 Zhang K, Hu X. 2016. Role of ppGpp in *Pseudomonas aeruginosa* acute  
723 pulmonary infection and virulence regulation. *Microbiological Research* 192:84–  
724 95.
- 725 99. Kim HY, Go J, Lee K-M, Oh YT, Yoon SS. 2018. Guanosine tetra- and  
726 pentaphosphate increase antibiotic tolerance by reducing reactive oxygen species  
727 production in *Vibrio cholerae*. *J Biol Chem* 293:5679–5694.



- 728 100. Dasgupta S, Das S, Biswas A, Bhadra RK, Das S. 2019. Small alarmones  
729 (p)ppGpp regulate virulence associated traits and pathogenesis of *Salmonella*  
730 *enterica* serovar Typhi. Cellular Microbiology 21.
- 731 101. Yin L, Ma H, Nakayasu ES, Payne SH, Morris DR, Harwood CS. 2019. Bacterial  
732 Longevity Requires Protein Synthesis and a Stringent Response. mBio  
733 10:e02189-19, /mbio/10/5/mBio.02189-19.atom.
- 734 102. Pokhrel A, Poudel A, Castro KB, Celestine MJ, Oludiran A, Rinehold AJ, Resek  
735 AM, Mhanna MA, Purcell EB. 2020. The (p)ppGpp synthetase RSH mediates  
736 stationary phase onset and antibiotic stress survival in *Clostridioides difficile*. J  
737 Bacteriol JB.00377-20, jb;JB.00377-20v1.
- 738
